# Supplementary material for: Genome-wide association study of aromatase inhibitor discontinuation due to musculoskeletal symptoms
Source: Research Square preprint supplement (doi:10.21203/rs.3.rs-1315678/v1), 2022-03-15
Supplement: Supplementary file 1 [file 8c77e6c28d2e337e45359e09.xlsx]

## Sheet: Supp T3
									Combined				Letrozole Arm				Exemestane Arm
Gene	rsID	CHR	POS	REF	ALT	TYPED	R2	SAMP_FREQ_ALT	HR	HR_lowerCI	HR_upperCI	PVALUE	HR	HR_lowerCI	HR_upperCI	PVALUE	HR	HR_lowerCI	HR_upperCI	PVALUE
ABCB1	rs1045642	7	87138645	A	G	TRUE	1	0.4525	1.07826	0.82322	1.41231	0.584235	0.965657	0.62707	1.48706	0.873947	1.18042	0.832242	1.67425	0.352273
CYP17A1	rs6163	10	104596924	C	A	TRUE	1	0.3938	1.01209	0.755469	1.35589	0.93578	1.01109	0.625265	1.63499	0.96413	1.0081	0.687857	1.47744	0.967005
CYP19A1	rs934635	15	51478777	G	A	TRUE	0.9998	0.1688	1.05682	0.733382	1.52289	0.766874	1.21223	0.682942	2.15173	0.510915	0.964581	0.595456	1.56253	0.883503
CYP19A1	rs4646	15	51502844	A	C	TRUE	0.99999	0.73	1.25759	0.894566	1.76793	0.187213	1.50549	0.891119	2.54343	0.126231	1.09365	0.693675	1.72425	0.699946
CYP19A1	rs700519	15	51507968	G	A	TRUE	1	0.0412	1.66767	0.923468	3.01159	0.0898915	1.47601	0.608933	3.57776	0.388744	2.013	0.896333	4.52085	0.0901003
CYP19A1	rs700518	15	51529112	T	C	TRUE	0.99998	0.4887	0.972848	0.725806	1.30398	0.853876	1.09264	0.705007	1.6934	0.691863	0.871251	0.584045	1.29969	0.499406
CYP19A1	rs4775936	15	51536022	C	T	TRUE	0.99997	0.4638	0.961271	0.721302	1.28107	0.787495	1.1061	0.719872	1.69956	0.645397	0.84806	0.574737	1.25136	0.406373
CYP19A1	rs10459592	15	51536141	T	G	TRUE	1	0.575	0.856742	0.654707	1.12112	0.259828	0.853224	0.575328	1.26535	0.429834	0.845067	0.582763	1.22544	0.374639
CYP19A1	rs1062033	15	51547938	C	G	TRUE	0.99916	0.4497	0.999745	0.751723	1.3296	0.998599	1.11559	0.726247	1.71366	0.61746	0.903387	0.614081	1.32899	0.605937
CYP19A1	rs1008805	15	51549599	G	A	TRUE	0.99899	0.5884	1.15007	0.852982	1.55062	0.359118	1.24817	0.791849	1.96745	0.339684	1.08181	0.727442	1.60881	0.697739
CYP27B1	rs4646536	12	58157988	A	G	FALSE	0.99173	0.3555	0.95637	0.705968	1.29559	0.773332	0.771037	0.482036	1.23331	0.277927	1.11117	0.741946	1.66415	0.608959
ESR1	rs2234693	6	152163335	T	C	TRUE	0.99988	0.4812	0.916734	0.697912	1.20417	0.532104	0.814711	0.5254	1.26333	0.35988	0.99396	0.702264	1.40682	0.972732
ESR1	rs9340799	6	152163381	A	G	TRUE	0.99989	0.3725	1.05114	0.792797	1.39367	0.728915	0.978633	0.617643	1.55061	0.926714	1.09721	0.768317	1.56689	0.609843
ESR1	rs9340835	6	152199931	G	A	FALSE	0.98011	0.3441	0.75365	0.550996	1.03084	0.0767404	0.732379	0.457147	1.17332	0.195225	0.762326	0.499193	1.16416	0.208996
ESR1	rs9322336	6	152200430	C	T	TRUE	0.99867	0.7736	0.640913	0.464824	0.88371	0.00664163	0.663958	0.41606	1.05956	0.0859082	0.614028	0.392339	0.96098	0.0328293
HSD17B2	rs11648233	16	82075317	C	A	TRUE	0.99483	0.5925	1.18562	0.902423	1.55768	0.221446	1.20108	0.796273	1.81167	0.382293	1.16801	0.80599	1.69262	0.411942
HTR2A	rs2296972	13	47428471	A	C	FALSE	0.95036	0.678	1.15582	0.84354	1.5837	0.367507	0.820755	0.511397	1.31725	0.413135	1.51181	0.975912	2.342	0.0641965
OPG	rs2073618	8	119964052	G	C	TRUE	1	0.4738	0.892483	0.680327	1.1708	0.411442	0.940116	0.623586	1.41731	0.76812	0.861309	0.5971	1.24243	0.424445
RANKL	rs7984870	13	43146482	G	C	TRUE	0.99995	0.4463	1.41817	1.06276	1.89244	0.0176186	1.24092	0.820147	1.87758	0.306965	1.60936	1.07076	2.41888	0.0220884
TCL1A	rs7158782	14	96169131	A	G	TRUE	0.99999	0.155	0.731495	0.479939	1.1149	0.145905	0.911867	0.495998	1.67642	0.76649	0.616685	0.343663	1.10661	0.105141
TCL1A	rs7159713	14	96169577	A	G	TRUE	1	0.155	0.731516	0.479956	1.11493	0.145937	0.911867	0.495998	1.67642	0.76649	0.616724	0.343691	1.10666	0.105174
TCL1A	rs2369049	14	96171851	A	G	TRUE	0.99954	0.1463	0.641405	0.408153	1.00796	0.0541499	0.816994	0.425307	1.5694	0.543952	0.534851	0.286087	0.999925	0.0499682
TCL1A	rs11849538	14	96175978	C	G	TRUE	0.99729	0.1403	0.68638	0.435971	1.08062	0.104125	1.00029	0.529276	1.89049	0.999276	0.498501	0.254528	0.976331	0.0423724
VDR	rs2228570	12	48272895	A	G	TRUE	0.96863	0.6507	1.11108	0.827723	1.49144	0.483152	1.10682	0.705448	1.73656	0.658741	1.11133	0.751512	1.64344	0.596911
VDR	rs11568820	12	48302545	C	T	TRUE	0.99996	0.18	0.990028	0.687132	1.42644	0.957104	0.922027	0.532776	1.59567	0.771736	1.0653	0.648929	1.74882	0.802497
Notes:
Alternate allele is the effect allele.
Position is based on genome build 37.
Adjusted for age (under 55 years), baseline VAS score, prior chemotherapy (taxane), and drug (exemestane)
